# Supplementary material
Source: PubMed Central journal article supplement (PMC4663674)
Supplement: NIHMS65230-supplement-FigS4.pdf [file NIHMS65230-supplement-FigS4.pdf]

Figure S4

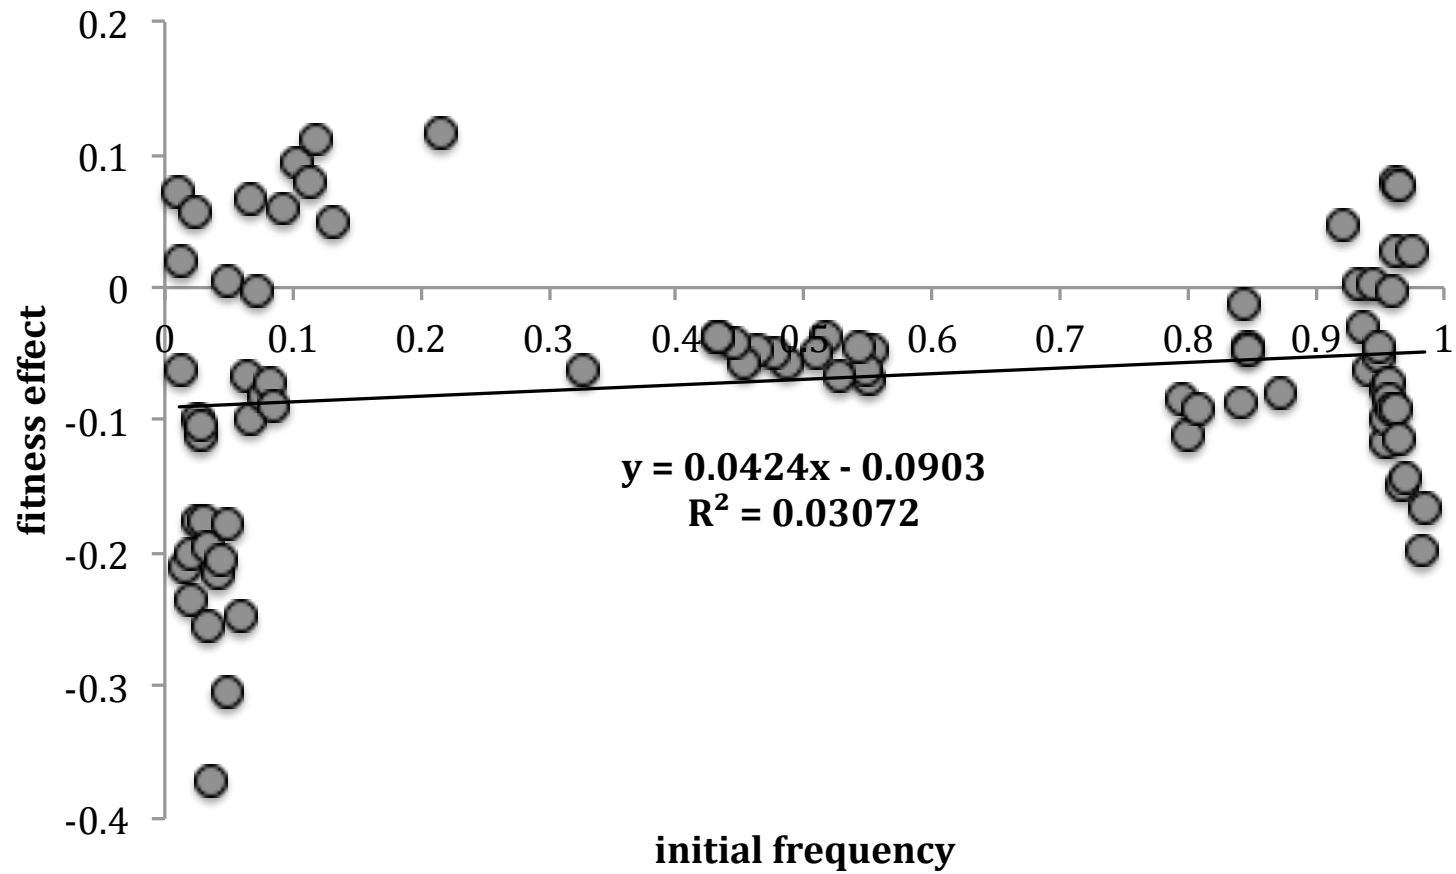

**Figure S4. Test for negative frequency dependence selection in competitions between resistance strains *H526Y* and *H526D***
