# Supplementary material
Source: PubMed Central journal article supplement (PMC4663674)
Supplement: NIHMS65230-supplement-TabS1.pdf [file NIHMS65230-supplement-TabS1.pdf]

**Table S1.** Fitness costs imposed by the antibiotic resistance alleles (*K43T*, *S531F*, *H526Y*, *H526D*) measured in competition against the sensitive reference strain.

|              | Antibiotic Resistance | Target Genes | Aminoacid change (location) | Fitness cost (relative to wild-type) | Standard Err |
|--------------|-----------------------|--------------|-----------------------------|--------------------------------------|--------------|
| <b>K43T</b>  | Streptomycin          | <i>rpsL</i>  | AAA - ACA (128)             | <b>0.092</b>                         | 0.034        |
| <b>S531F</b> | Rifampicin            | <i>rpoB</i>  | TCC - TTC (1592)            | <b>0.096</b>                         | 0.011        |
| <b>H526Y</b> | Rifampicin            | <i>rpoB</i>  | CAC - TAC (1376)            | <b>0.073</b>                         | 0.014        |
| <b>H526D</b> | Rifampicin            | <i>rpoB</i>  | CAC - GAC (1576)            | <b>0.064</b>                         | 0.017        |
