# Supplementary material
Source: PubMed Central journal article supplement (PMC4663674)
Supplement: NIHMS65230-supplement-TabS2.pdf [file NIHMS65230-supplement-TabS2.pdf]

**Table S2. Genotypes of the evolved clones from competition between *H526Y*<sup>Rif</sup> and *S531F*<sup>Rif</sup>**

***Genotype of H526Y Evolved Clones***

galK:YFP, rpoB (H526Y), rpoA (T196I), waaZ (S280P)  
galK:YFP, rpoB (H526Y), rpoA (T196I)  
galK:CFP, rpoB (H526Y), rpoC (Unknown)  
galK:CFP, rpoB (H526Y), yifE (G39D)  
galK:CFP, rpoB (H526Y), rpoC (R1224C)  
galK:CFP, rpoB (H526Y), rpoC (S486P)  
galK:CFP, rpoB (H526Y), rpoC (S486P)  
galK:CFP, rpoB (H526Y), rpoC (S486P)  
galK:CFP, rpoB (H526Y), rpoC (H540P)

***Genotype of S531F Evolved Clones***

galK:YFP, rpoB (S531F), envR (IS5)  
galK:YFP, rpoB (S531F), znuA (F37L), sspA (L156P)  
galK:YFP, rpoB (S531F), znuA (F37L), sspA (L156P)  
galK:YFP, rpoB (S531F), yeaR (IS186)  
galK:YFP, rpoB (S531F), nadK/recN (Intergenic), yedW (IS1)  
galK:YFP, rpoB (S531F), rpoC (K50T)  
galK:YFP, rpoB (S531F), paoB (V231E)  
galK:YFP, rpoB (S531F), nrfG/gltP (Intergenic)
