# Supplementary material
Source: PubMed Central journal article supplement (PMC4663674)

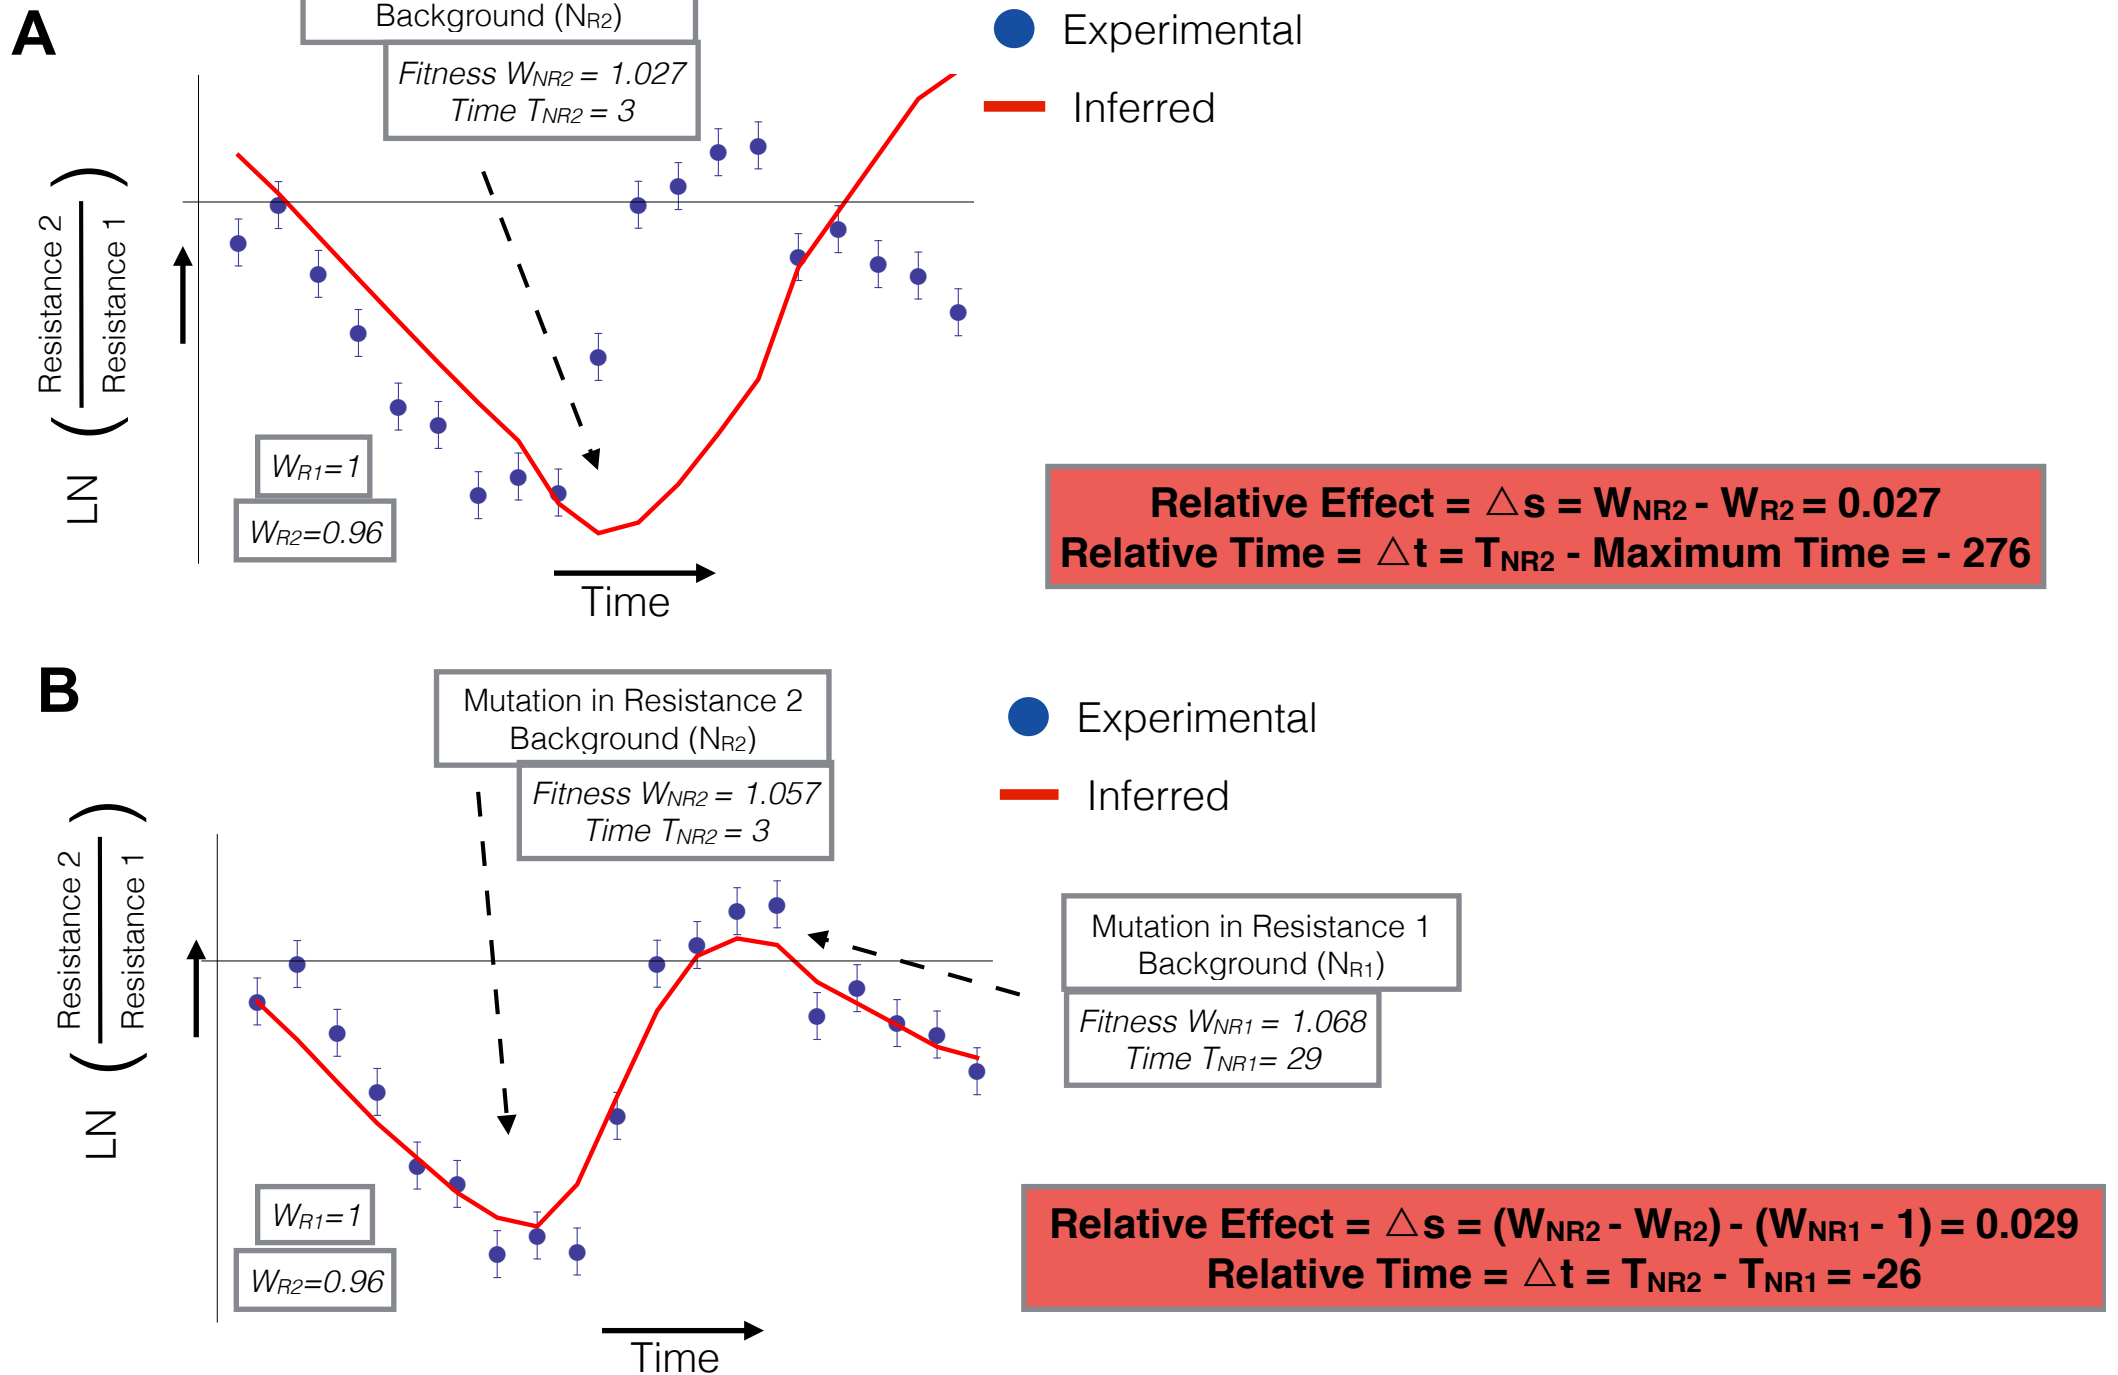

**Figure S1. Example of the fitting process for a simulated experimental population.**

Supplement: NIHMS65230-supplement-FigS1.pdf [file NIHMS65230-supplement-FigS1.pdf]

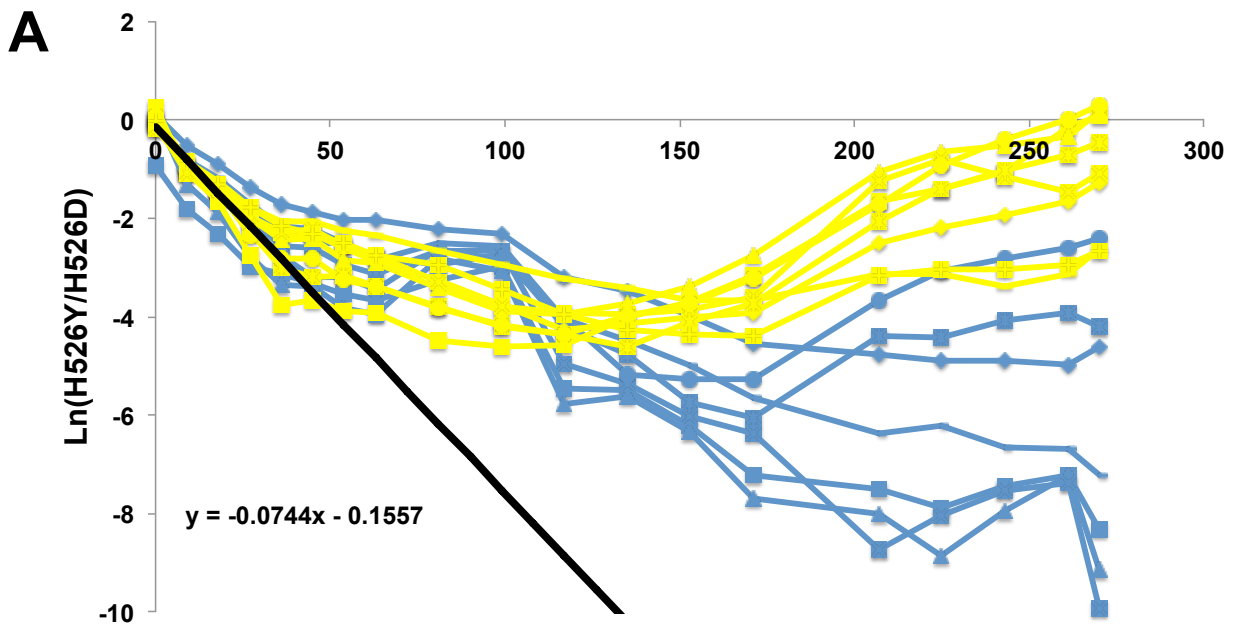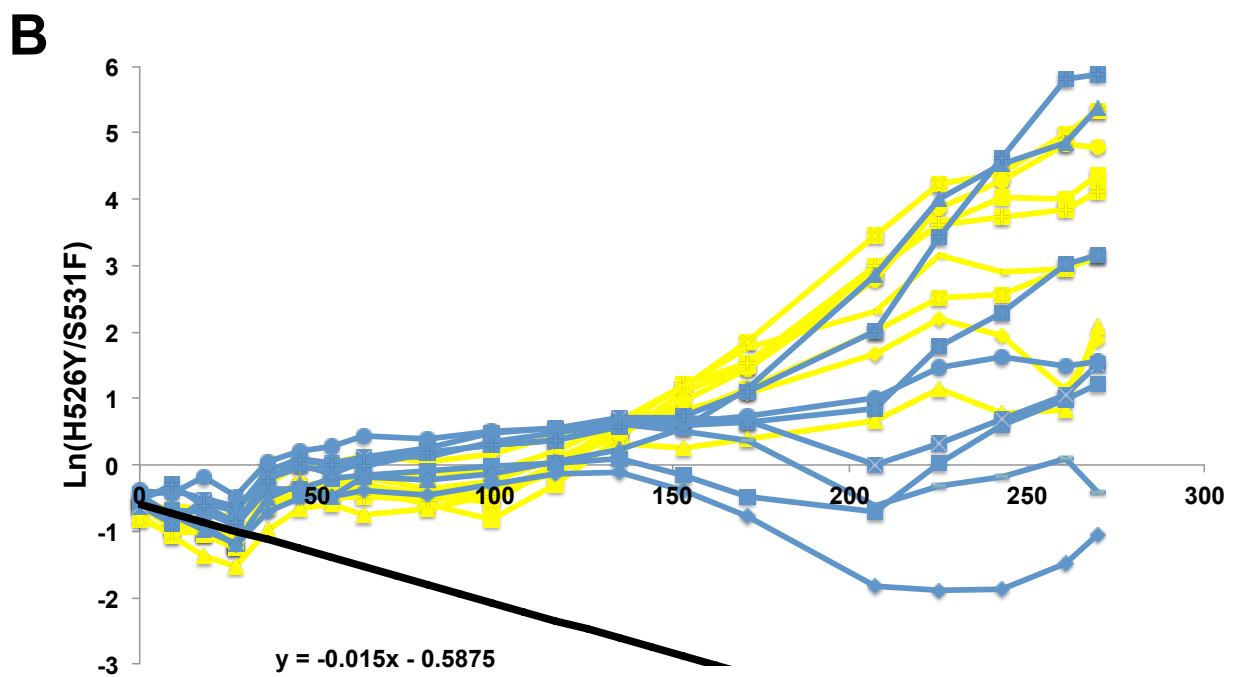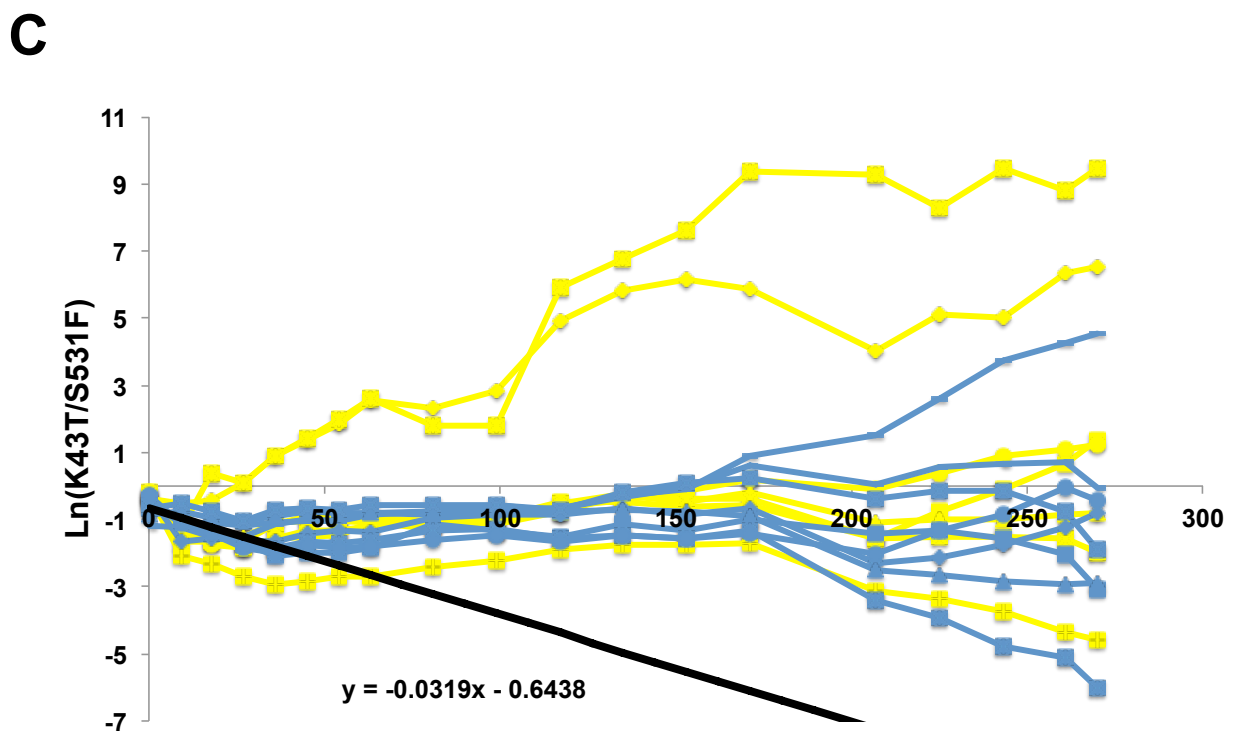

Figure S2. Long-term dynamics with the identification of the fluorescent backgrounds

Supplement: NIHMS65230-supplement-FigS2.pdf [file NIHMS65230-supplement-FigS2.pdf]

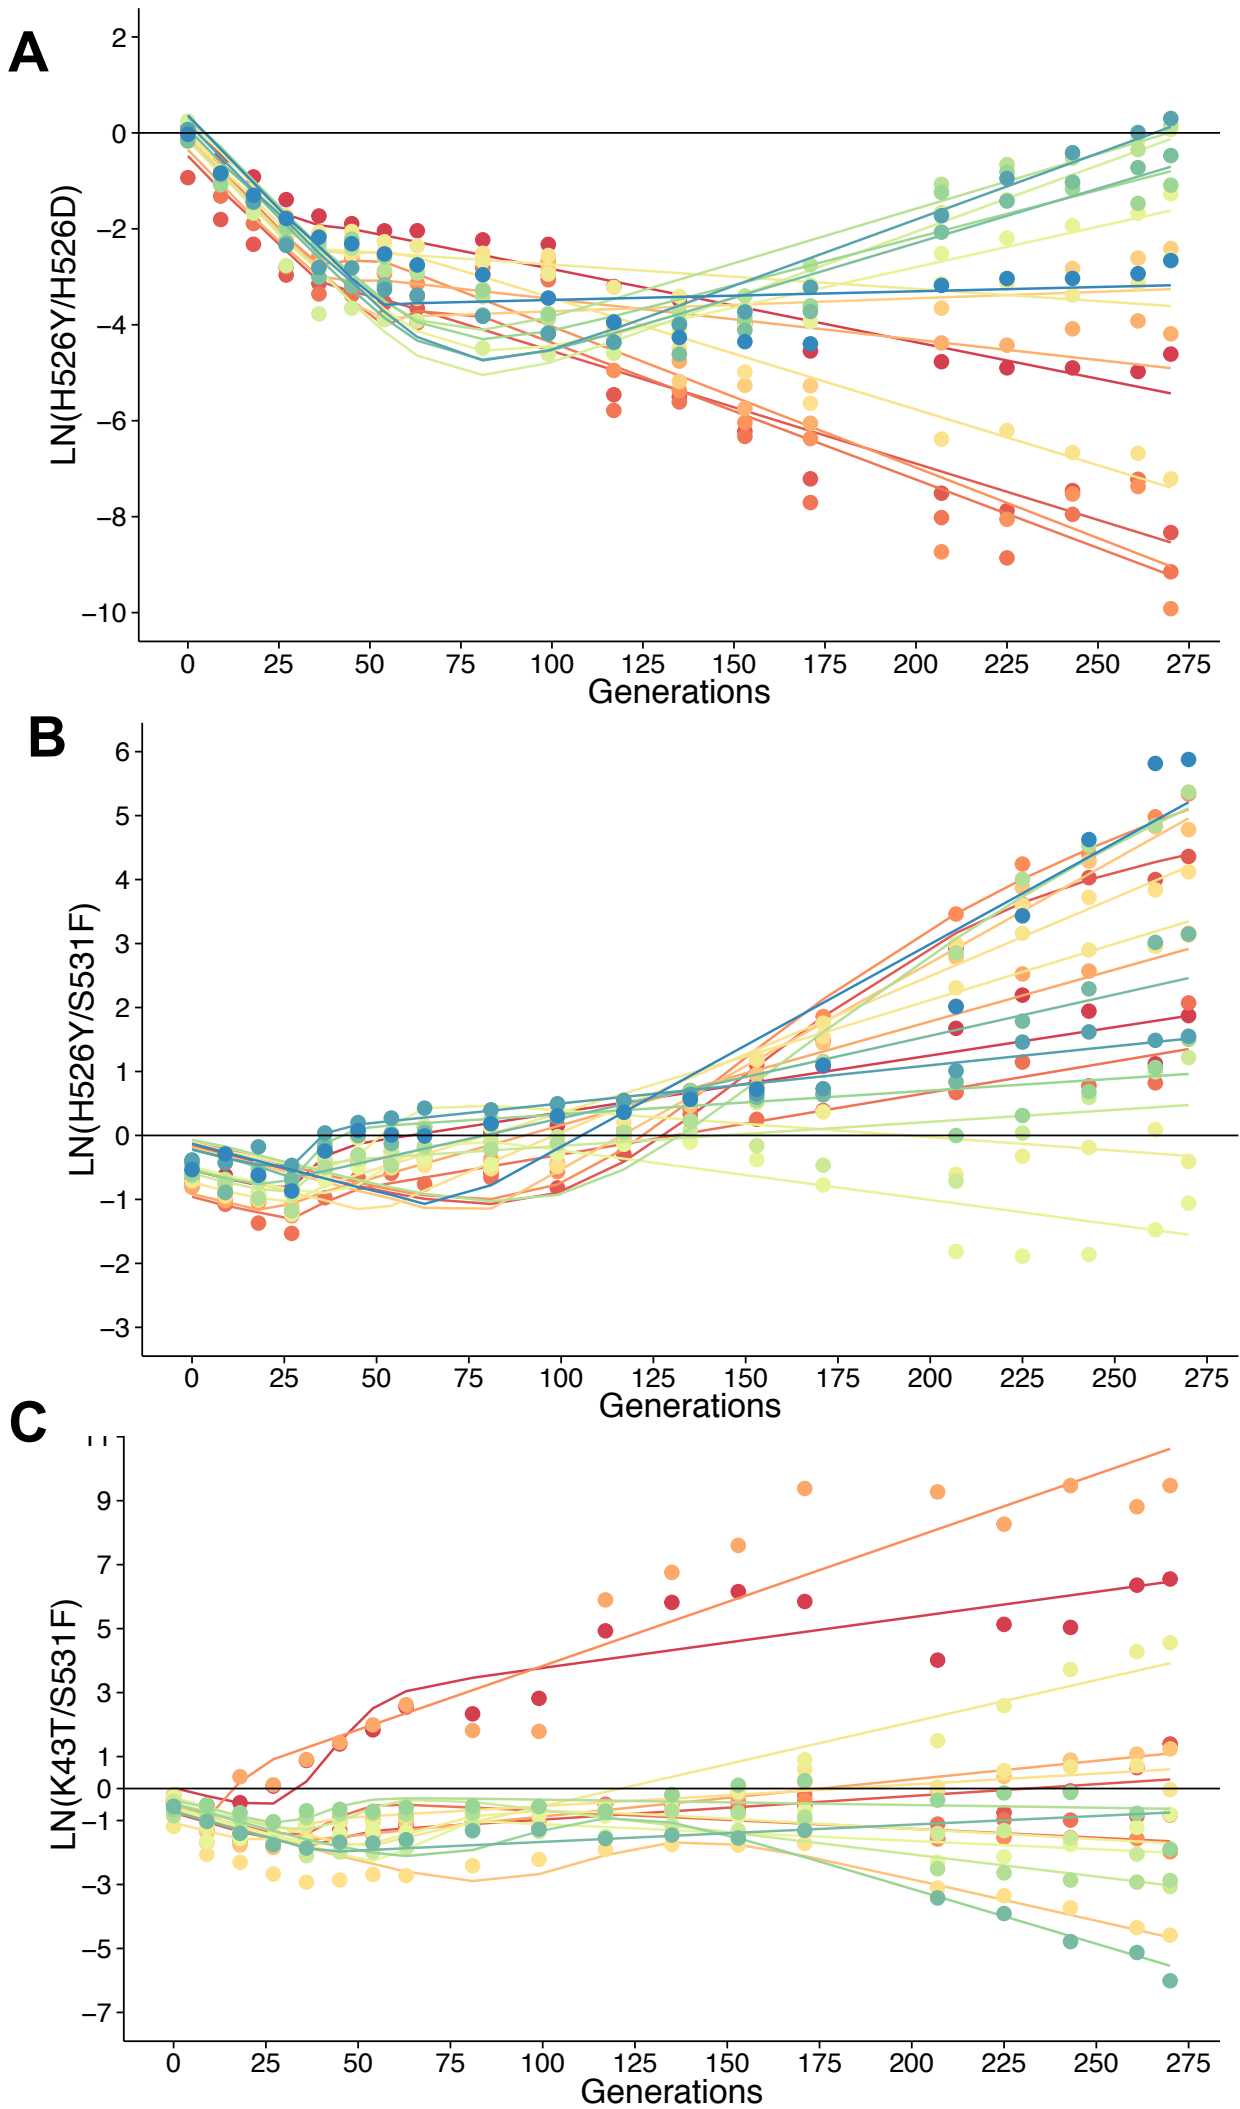

**Figure S3. Long-term dynamics from the inferred parameters for each replicate population**

Supplement: NIHMS65230-supplement-FigS3.pdf [file NIHMS65230-supplement-FigS3.pdf]
